# Supplementary material for: Transcriptomes of Different Tissues of Flax (Linum usitatissimum L.) Cultivars With Diverse Characteristics
Source: PubMed Central journal article supplement (PMC7755106; doi:10.3389/fgene.2020.565146), 2020-11-30

**Supplementary Data 9. Expression level (CPM) of 13 *CAD* family genes in leaves, flowers, stems, seedling roots, and seedling shoots of six flax cultivars/lines: #3896, Alizee, Atlant, Diplomat, LM98, and Universal.** Green bars – leaves, blue – flowers, gray – stems, orange – seedling roots, red – seedling shoots.

**CAD1A**

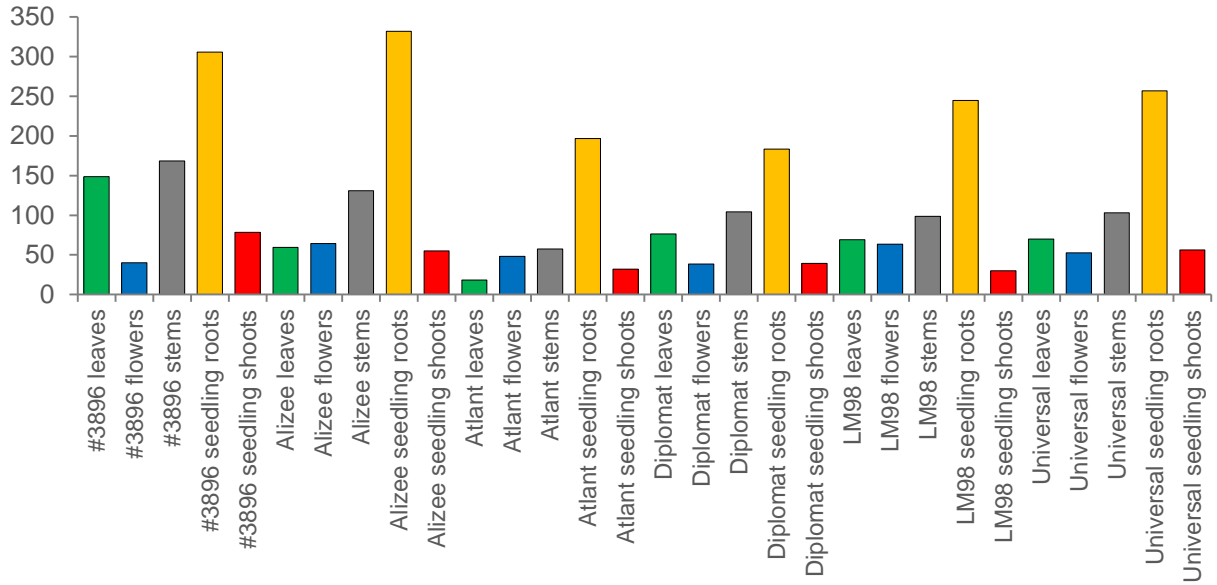

**CAD1B**

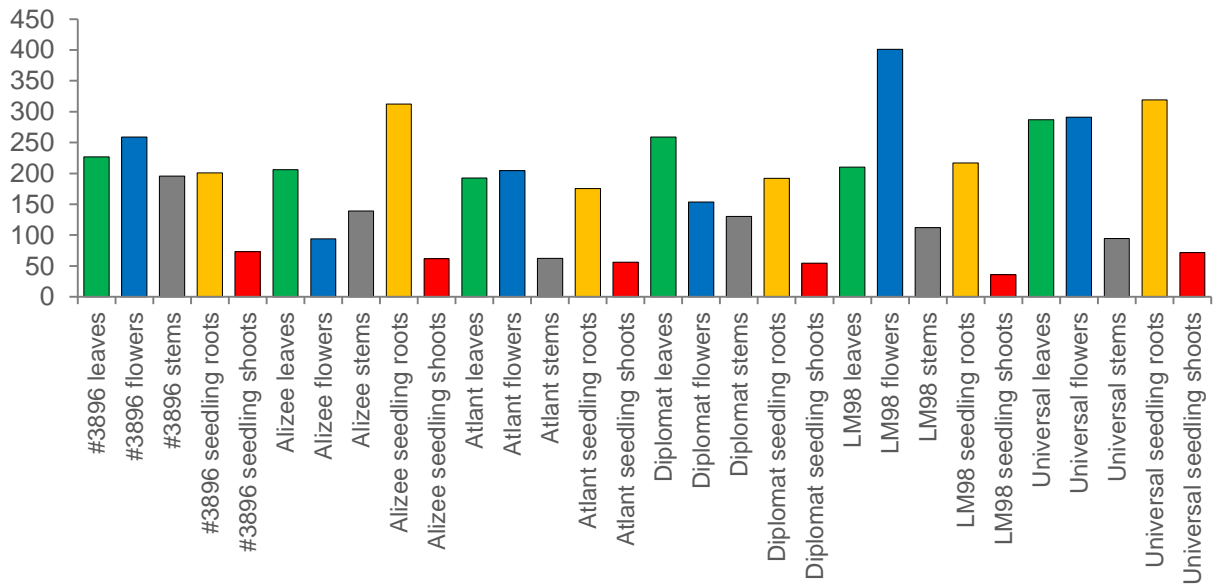

### CAD2A

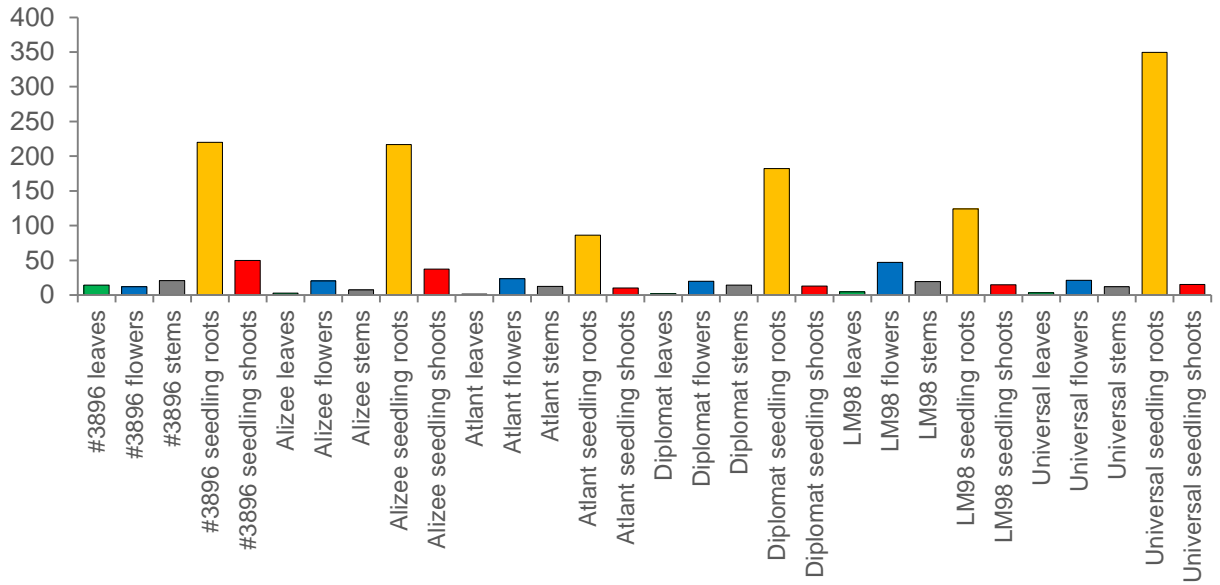

### CAD2B

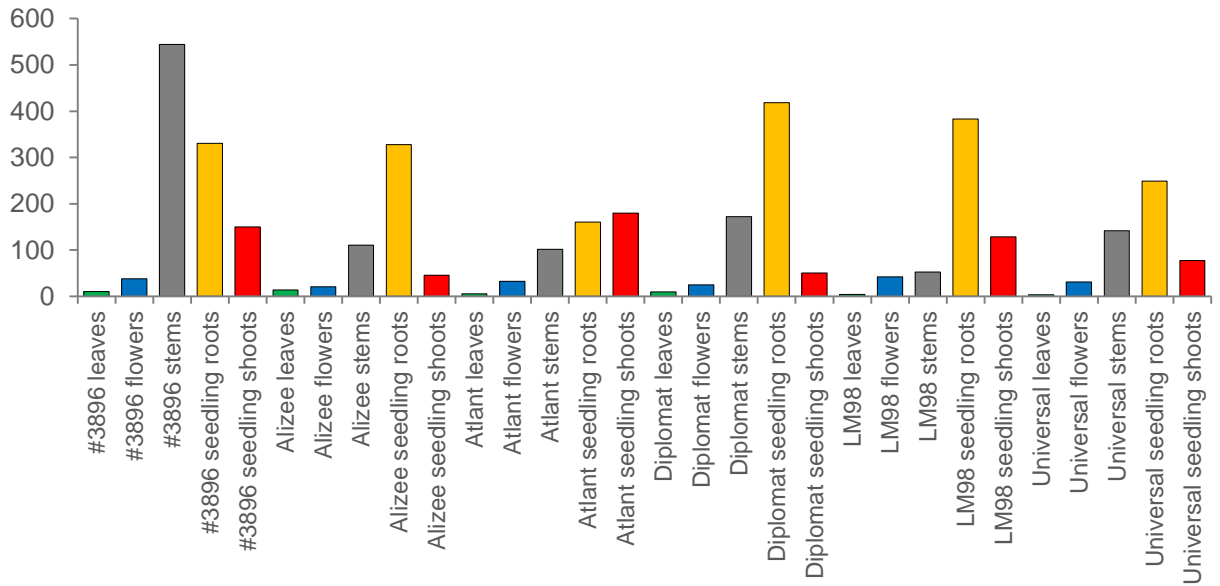

### CAD3A

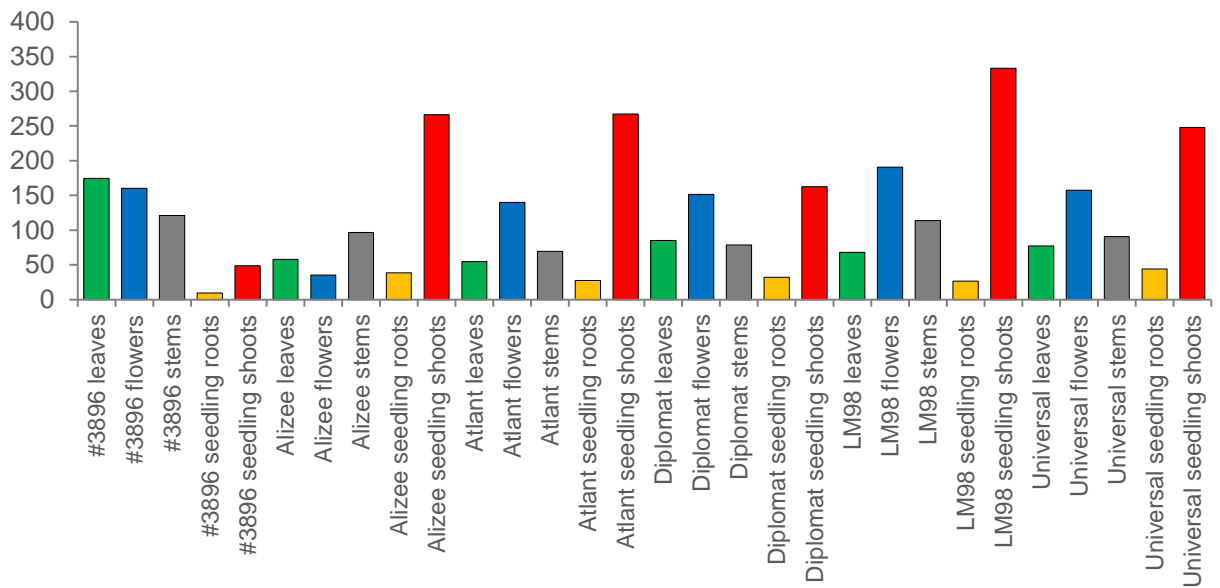

### CAD3B

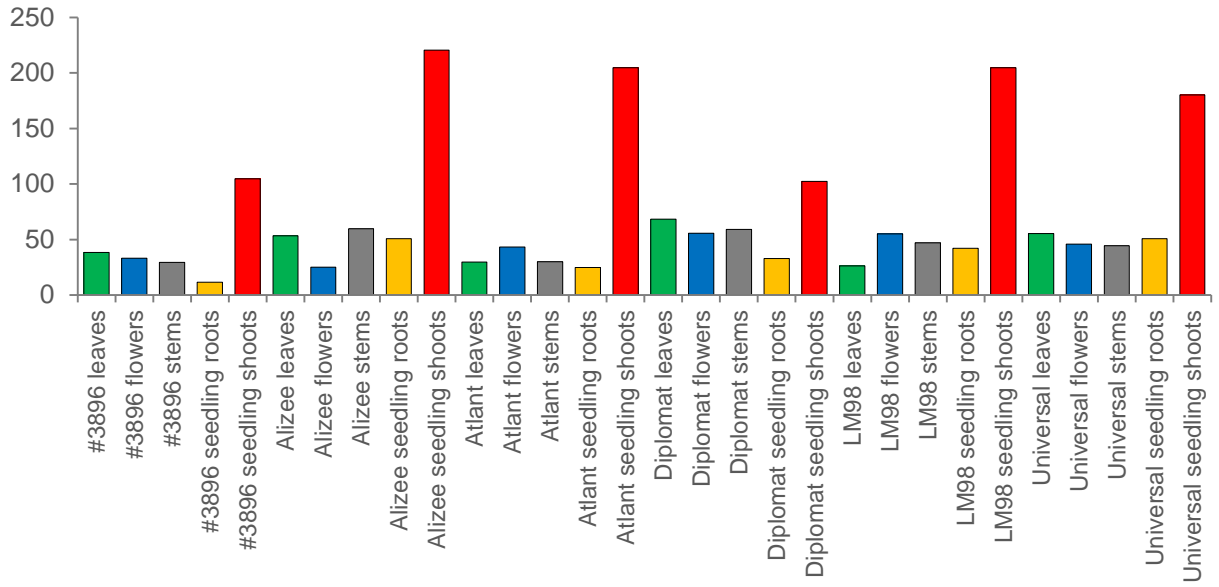

### CAD4A

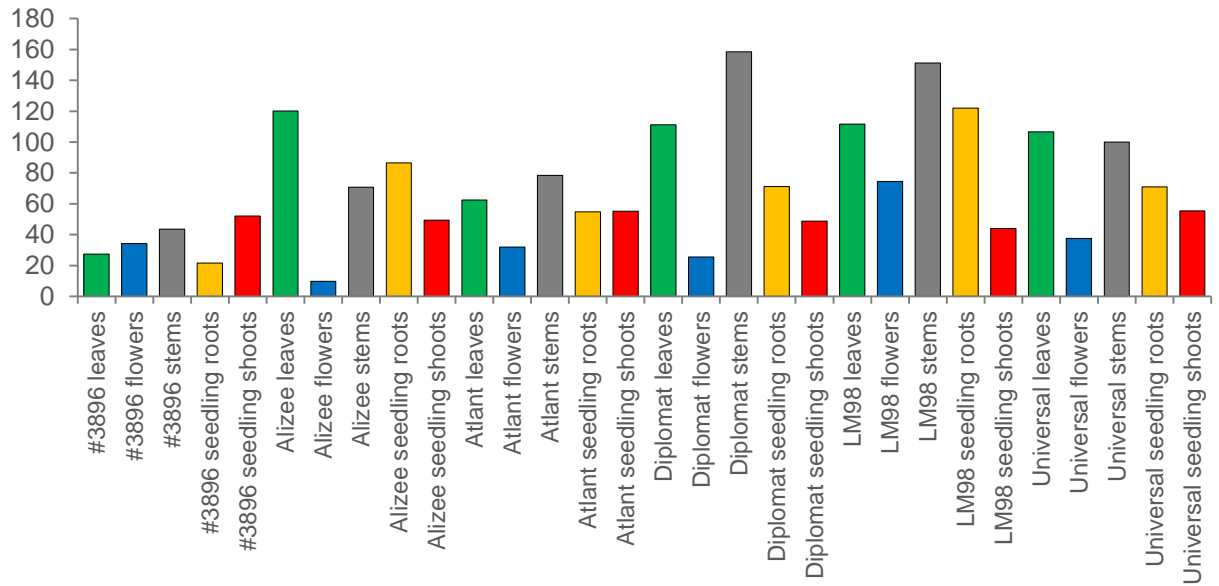

### CAD4B

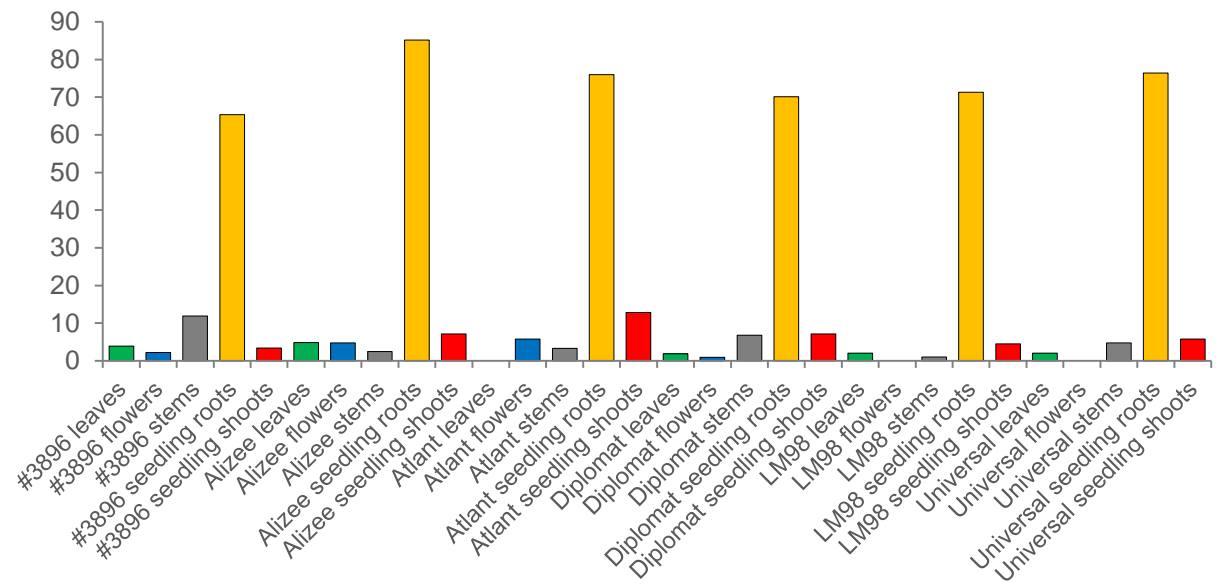

### CAD5A

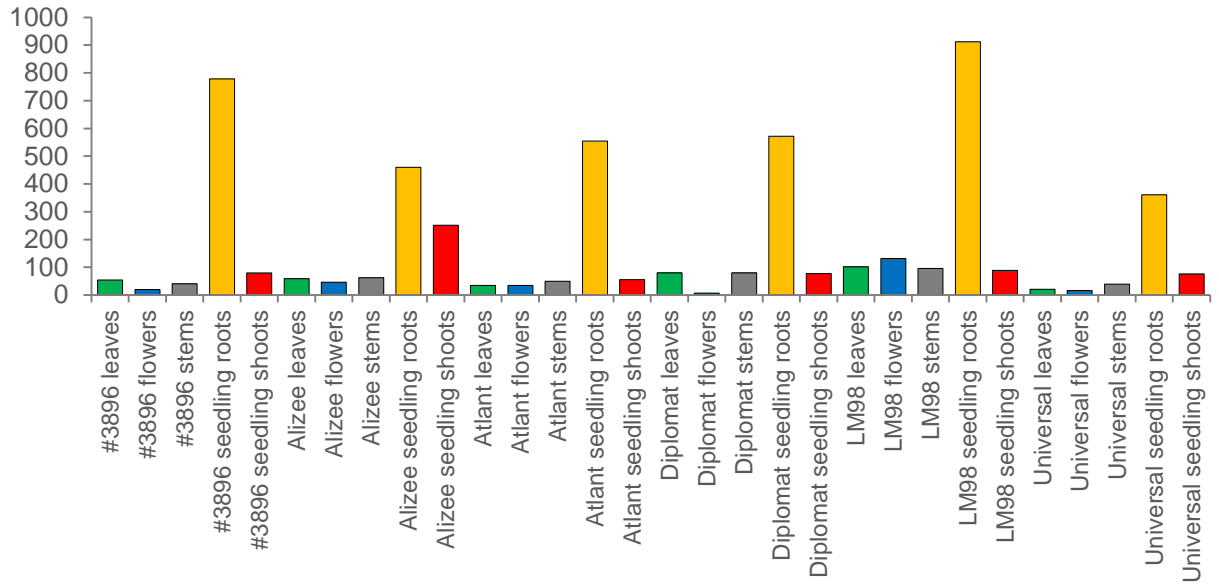

### CAD5B

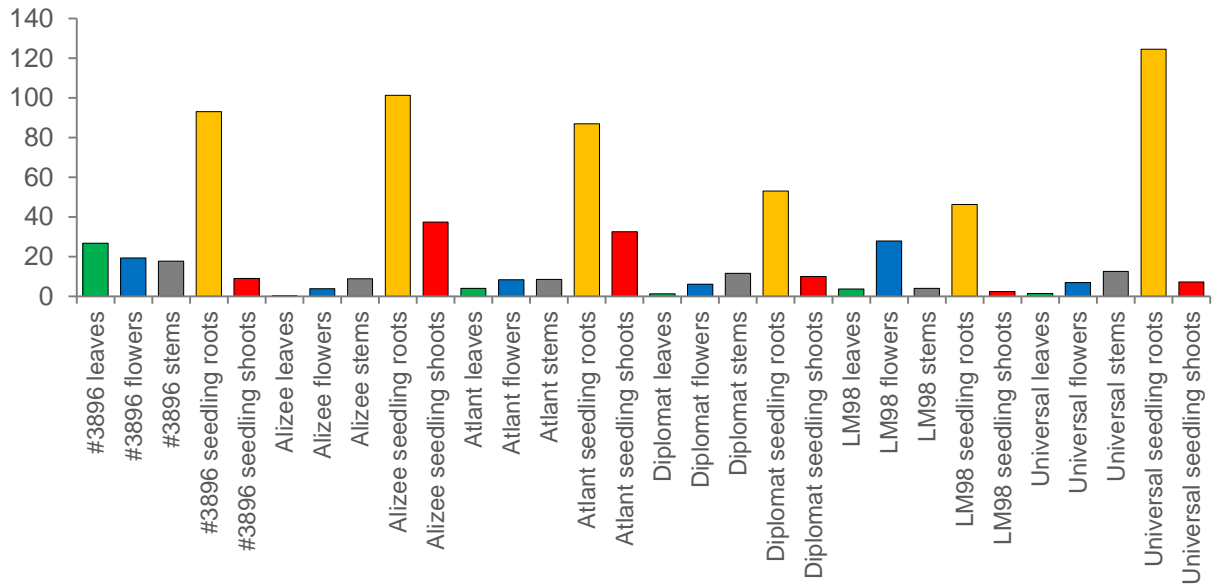

### CAD6

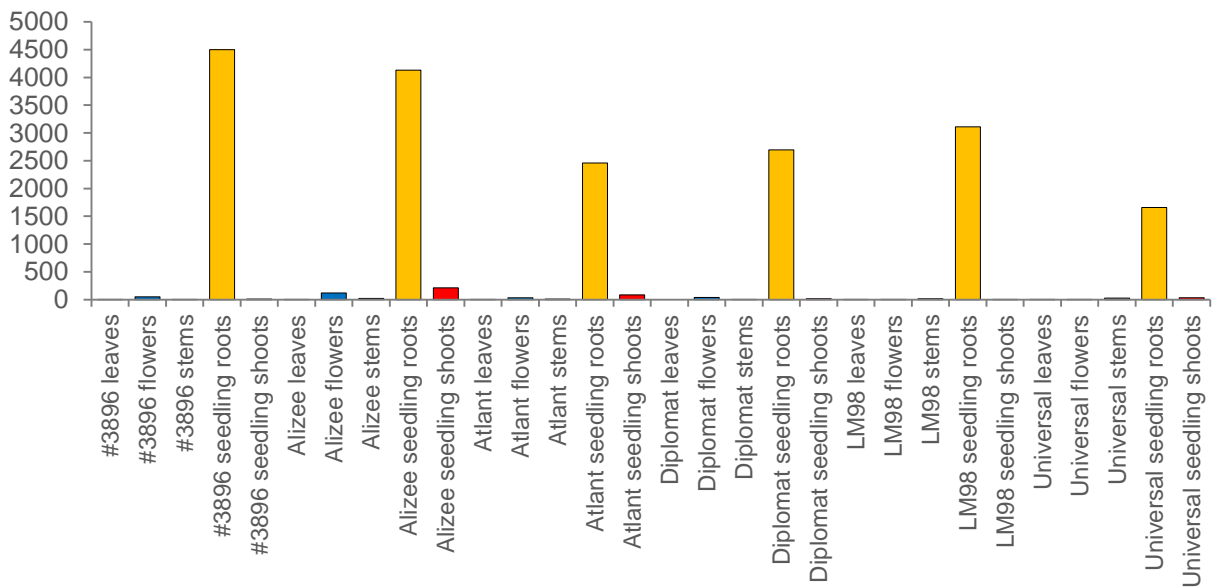

### CAD7

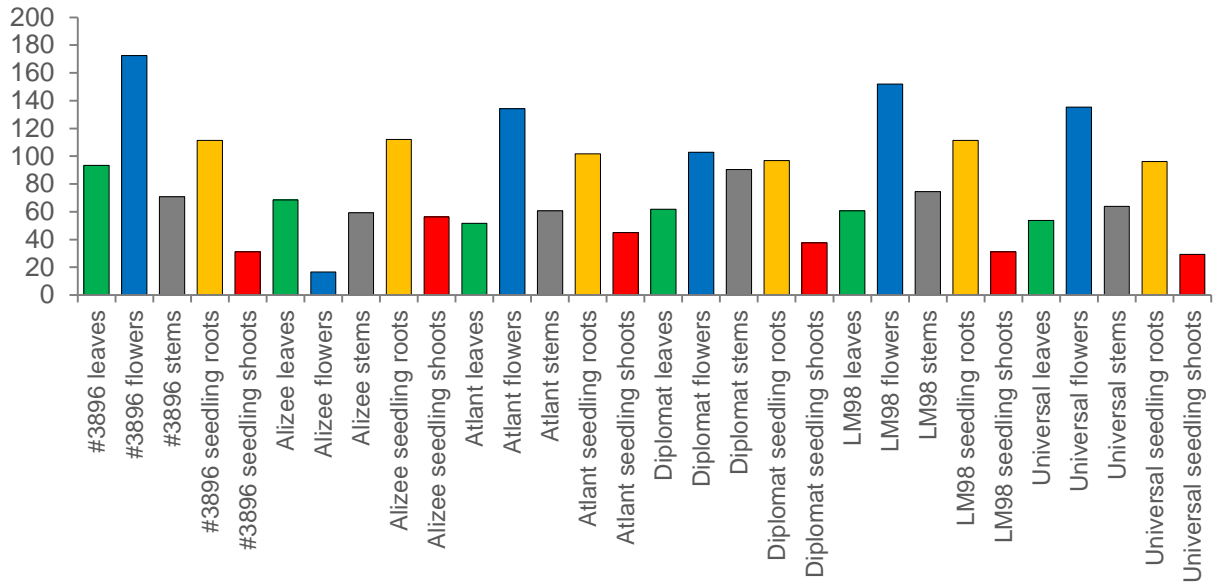

### CAD8

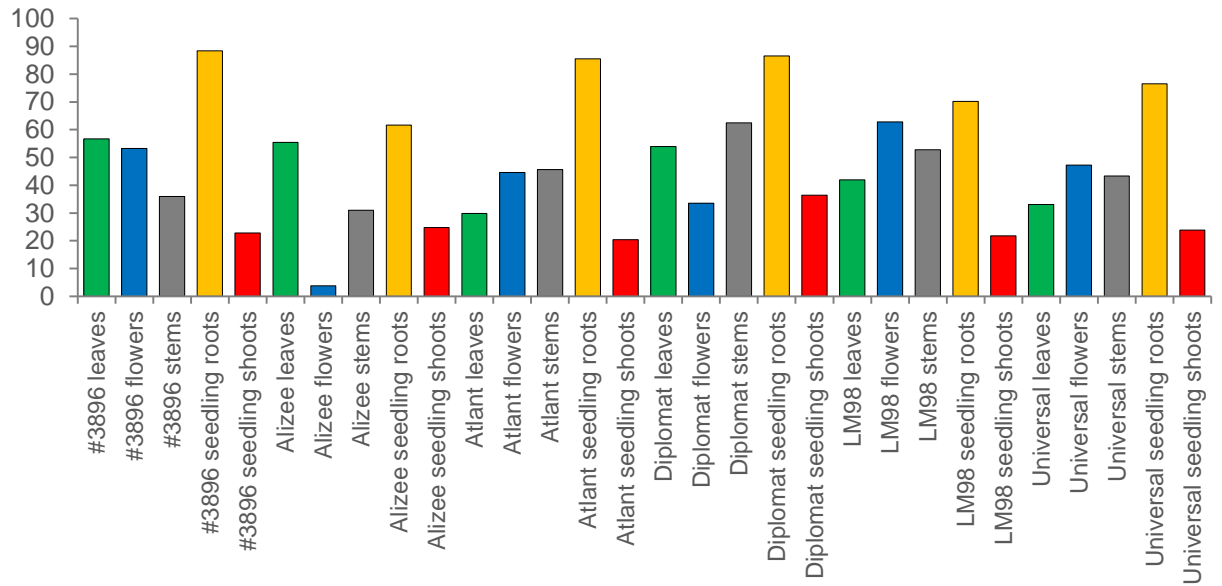

Supplement: Data_Sheet_9.pdf [file Data_Sheet_9.pdf]
