# Supplementary material for: Transcriptomes of Different Tissues of Flax (Linum usitatissimum L.) Cultivars With Diverse Characteristics
Source: PubMed Central journal article supplement (PMC7755106; doi:10.3389/fgene.2020.565146), 2020-11-30
Supplement: Data_Sheet_3.pdf [file Data_Sheet_3.pdf]

|                    |                      |                                                                                                                                                                                                                                                          |
|--------------------|----------------------|----------------------------------------------------------------------------------------------------------------------------------------------------------------------------------------------------------------------------------------------------------|
|                    | flowers              | n3896_flowers<br>Alizee_flowers<br>Atlant_flowers<br>Diplomat_flowers<br>LM98_flowers<br>Universal_flowers                                                                                                                                               |
|                    | stems                | n3896_stems<br>Alizee_stems<br>Atlant_stems<br>Diplomat_stems<br>LM98_stems<br>Universal_stems                                                                                                                                                           |
|                    | seedling roots       | n3896_seedling_roots<br>Alizee_seedling_roots<br>Atlant_seedling_roots<br>Diplomat_seedling_roots<br>LM98_seedling_roots<br>Universal_seedling_roots                                                                                                     |
|                    | seedling shoots      | n3896_seedling_shoots<br>Alizee_seedling_shoots<br>Atlant_seedling_shoots<br>Diplomat_seedling_shoots<br>LM98_seedling_shoots<br>Universal_seedling_shoots                                                                                               |
| <b>PRJNA229810</b> | shoots               | SRR1038482<br>SRR1056618<br>SRR1056619<br>SRR1056620<br>SRR1056621<br>SRR1056622<br>SRR1056623<br>SRR1056624<br>SRR1056625<br>SRR1421513                                                                                                                 |
| <b>PRJNA251268</b> | bast fiber and xylem | SRR1587386<br>SRR1587387<br>SRR1587388<br>SRR1587389<br>SRR1587390<br>SRR1587391<br>SRR1587392<br>SRR1587393<br>SRR1587394<br>SRR1587395<br>SRR1587396<br>SRR1587397<br>SRR1587398<br>SRR1587399<br>SRR1587400<br>SRR1587401<br>SRR1587402<br>SRR1587403 |

|                    |                                                                     |                                                                                                                                                                                                                                                                                                                                               |
|--------------------|---------------------------------------------------------------------|-----------------------------------------------------------------------------------------------------------------------------------------------------------------------------------------------------------------------------------------------------------------------------------------------------------------------------------------------|
| <b>PRJNA412801</b> | roots (control)                                                     | 401-449-TOST-control_S8<br>403-451-TOST-control_S22<br>409-3896-control_S12<br>411-3896-control_S18<br>413-Dakota-control_S15<br>415-Dakota-control_S16<br>417-3896-x-AP5-control_S6<br>419-3896-x-AP5-control_S1<br>421-Dakota-8-x-AP5-control_S11<br>423-Dakota-8-x-AP5-control_S24<br>454-AP5-control_S7<br>456-AP5-control_S14            |
|                    | roots (infected with <i>Fusarium oxysporum</i> f. sp. <i>lini</i> ) | 425-459-TOST-Fusarium_S19<br>427-461-TOST-Fusarium_S21<br>433-3896-Fusarium_S13<br>435-3896-Fusarium_S10<br>437-Dakota-Fusarium_S3<br>439-Dakota-Fusarium_S20<br>441-3896-x-AP5-Fusarium_S2<br>443-3896-x-AP5-Fusarium_S4<br>445-Dakota-8-x-AP5-Fusarium_S23<br>447-Dakota-8-x-AP5-Fusarium_S17<br>464-AP5-Fusarium_S9<br>466-AP5-Fusarium_S5 |
| <b>PRJNA539945</b> | seeds                                                               | SRR8978764<br>SRR8978765<br>SRR8978766<br>SRR8978767<br>SRR8978768<br>SRR8978769<br>SRR8978770<br>SRR8978771                                                                                                                                                                                                                                  |
